# Supplementary material for: Synthesis of Low-Cost and High-Performance Dual-Atom Doped Carbon-Based Materials with a Simple Green Route as Anodes for Sodium-Ion Batteries
Source: MDPI journal article supplement (doi:10.3390/molecules28217314), 2023-10-28
Supplement: s1 [file s1]

# Supplementary Materials

## Synthesis of Low-Cost and High-Performance Dual-Atom Doped Carbon-Based Materials with a Simple Green Route as Anodes for Sodium-Ion Batteries

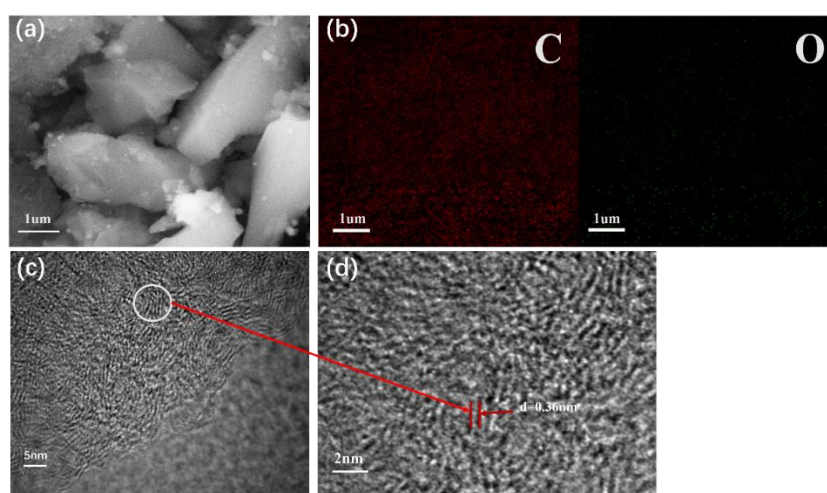

**Figure S1** (a) SEM images of OC (b) the EDS of OC, (c, d) TEM images of OC respectively.

**Table S1** Comparison of the electrochemical performance of N, S co-doped carbon with other carbon materials reported in previous literature.

| Precursor                            | Capacity and cycle stability                                         | High-Rate Capability (mAh g <sup>-1</sup> )      | ICE    | Ref |
|--------------------------------------|----------------------------------------------------------------------|--------------------------------------------------|--------|-----|
| This work                            | 183 mAh g <sup>-1</sup> after 3000 cycles at 1 A g <sup>-1</sup>     | 170 mAh g <sup>-1</sup> at 10 A g <sup>-1</sup>  | 81%    |     |
| Bagasse                              | 155 mAh g <sup>-1</sup> after 2000 cycles at 1 A g <sup>-1</sup>     | 148 mAh g <sup>-1</sup> at 5 A g <sup>-1</sup>   | 58.7%  | 33  |
| SnCl <sub>4</sub> ·5H <sub>2</sub> O | 380.1 mAh g <sup>-1</sup> after 200 cycles at 500 mA g <sup>-1</sup> | 310.6 mAh g <sup>-1</sup> at 4 A g <sup>-1</sup> | 68.9%  | 36  |
| algae-Carrageen                      | 227 mAh g <sup>-1</sup> after 100 cycles at 0.1 A g <sup>-1</sup>    | 109 mAh g <sup>-1</sup> at 10 A g <sup>-1</sup>  | 32.7%  | 39  |
| donkey-hide gelatin pulp             | 266 mAh g <sup>-1</sup> after 500 cycles at 0.5 A g <sup>-1</sup>    | 98 mAh g <sup>-1</sup> at 5 A g <sup>-1</sup>    | 62%    | 41  |
| citrate sodium                       | 223 mAh g <sup>-1</sup> after 2000 cycles at 1 A g <sup>-1</sup>     | 102 mAh g <sup>-1</sup> at 10 A g <sup>-1</sup>  | /      | 42  |
| Mango-peels                          | 351 mAh g <sup>-1</sup> after 200 cycles at 1 A g <sup>-1</sup>      | 136 mAh g <sup>-1</sup> at 4 A g <sup>-1</sup>   | 52.03% | 43  |

|                  |                                                 |                                                |   |    |
|------------------|-------------------------------------------------|------------------------------------------------|---|----|
|                  | cycles at 100 mA g <sup>-1</sup>                | g <sup>-1</sup>                                |   |    |
| medicine residue | 801 mAh g <sup>-1</sup> at 0.1A g <sup>-1</sup> | 402 mAh g <sup>-1</sup> at 5 A g <sup>-1</sup> | / | 44 |

**Table S2** Comparison of the electrochemical performance of N, S co-doped carbon with this work

| Sample  | C      | O     | N     | S     |
|---------|--------|-------|-------|-------|
| NSC1100 | 92.09% | 5.39% | 1.08% | 1.44% |
| NSC1150 | 87.92% | 9.22% | 1.16% | 1.7%  |
| NSC1190 | 92.04% | 6.07% | 0.78% | 1.11% |
